# Supplementary material for: Brief communication: New evidence further constraining Tibetan ice core chronologies to the Holocene
Source: Copernicus journal article supplement (doi:10.5194/tc-15-2109-2021), 2021-04-28
Supplement: Supplementary file 1 [file tc-15-2109-2021-supplement.pdf]

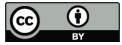

*Supplement of*

## **Brief communication: New evidence further constraining Tibetan ice core chronologies to the Holocene**

**Shugui Hou et al.**

*Correspondence to:* Shugui Hou ([shugui@nju.edu.cn](mailto:shugui@nju.edu.cn))

The copyright of individual parts of the supplement might differ from the article licence.

- Figures S1 to S6.
- Tables S1 and S2.

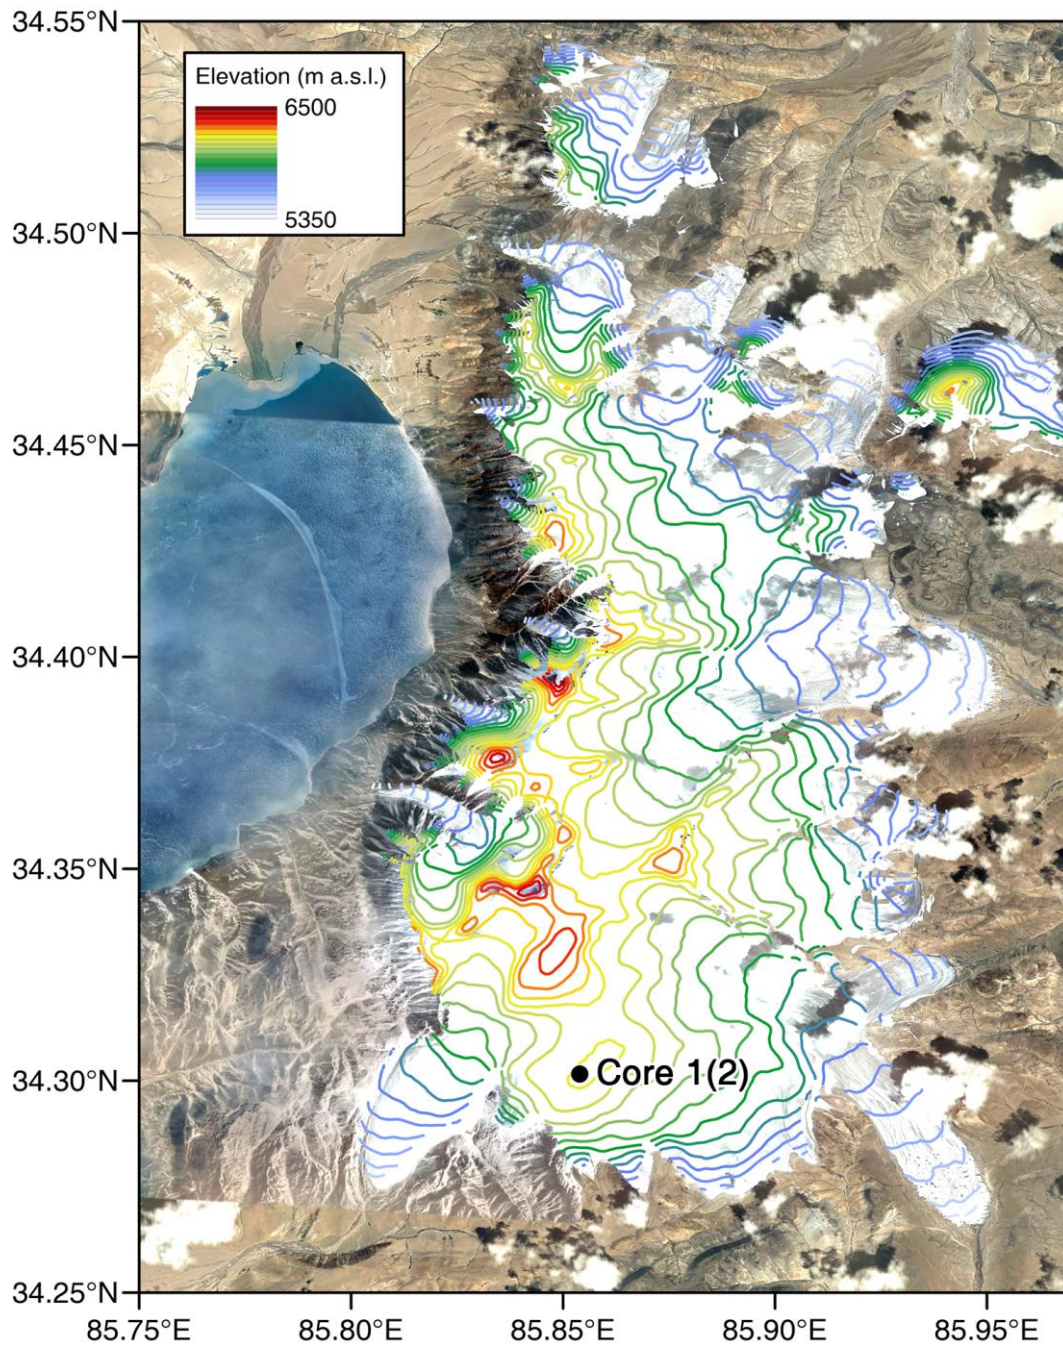

Fig. S1. (a) Satellite image of the ZK glacier with location of the ice-core drilling site  
 5 (black dot). Elevation contour lines were superimposed on the image of the ice cap.  
 The satellite imagery map is available at: <https://www.mapsofworld.com/satellite-maps/world.html>. The elevation contour data were extracted using the Shuttle Radar Topography Mission (SRTM) 90m DEM digital elevation database, available at <http://srtm.csi.cgiar.org/>.

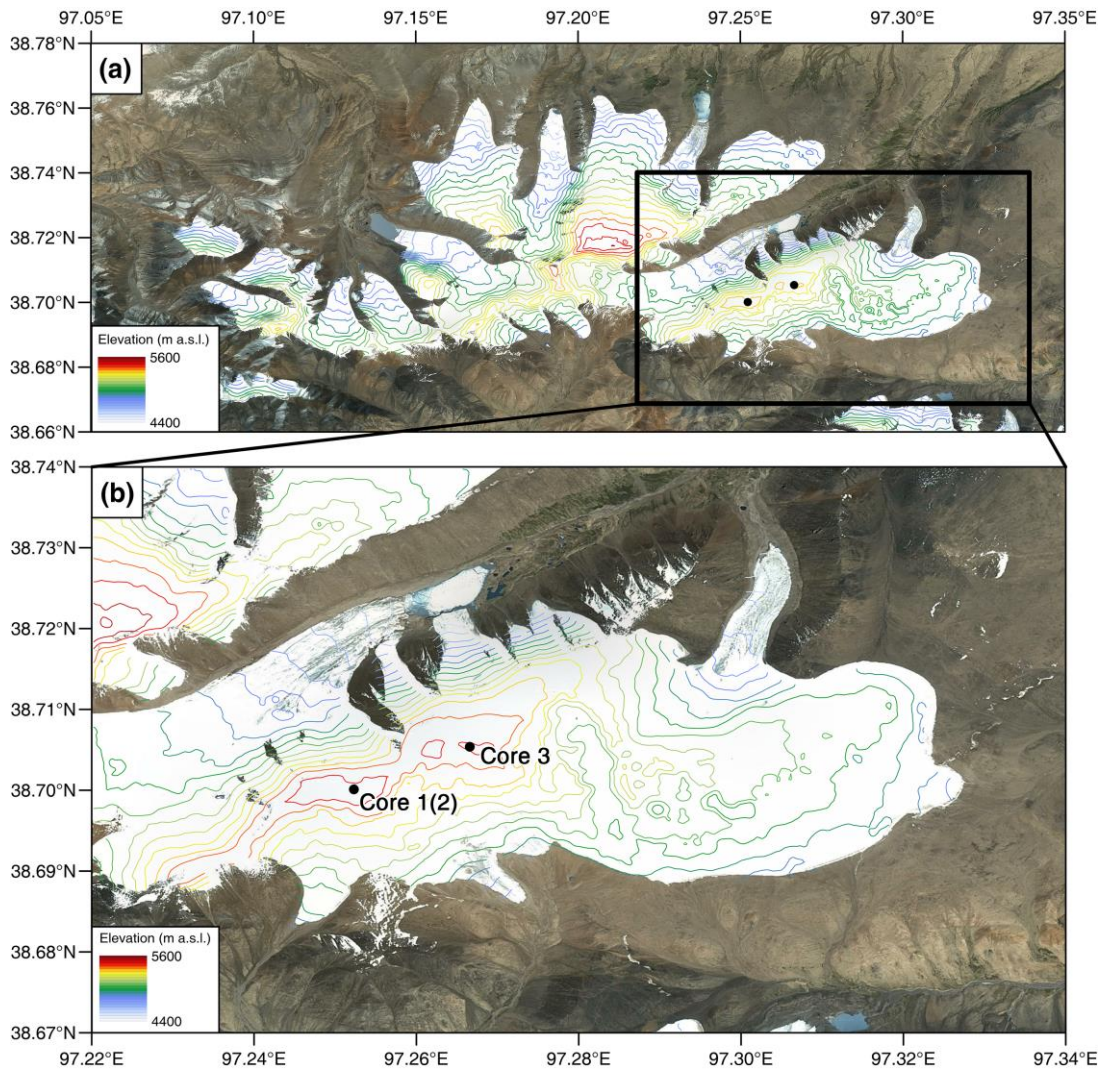

Fig. S2. Satellite image of the SLNS glacier with location of the ice-core drilling sites (black dots). Elevation contour lines were superimposed on the image of the glacier. The satellite imagery map is available at: <https://www.mapsofworld.com/satellite-maps/world.html>. The elevation contour data were extracted using the Shuttle Radar Topography Mission (SRTM) 90m DEM digital elevation database, available at <http://srtm.csi.cgiar.org/>.

15

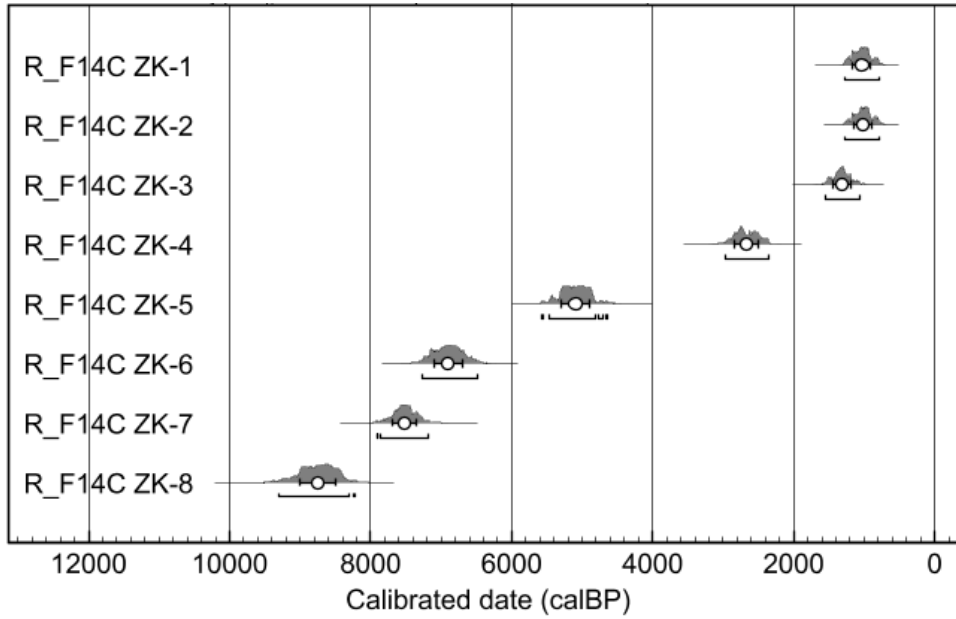

20 Fig. S3. The  $^{14}\text{C}$  cal age probability distributions of the ZK ice core samples, as derived in OxCal v4.3.2 using the IntCal 13 radiocarbon calibration curve (Ramsey and Lee, 2013; Reimer et al., 2013). Probability distributions of calibrated ages are indicated as grey area with the mean age ( $\mu$ ) shown as dot together with the  $1\sigma$  range. The lines below the probability distribution areas indicate the  $2\sigma$  range.

25

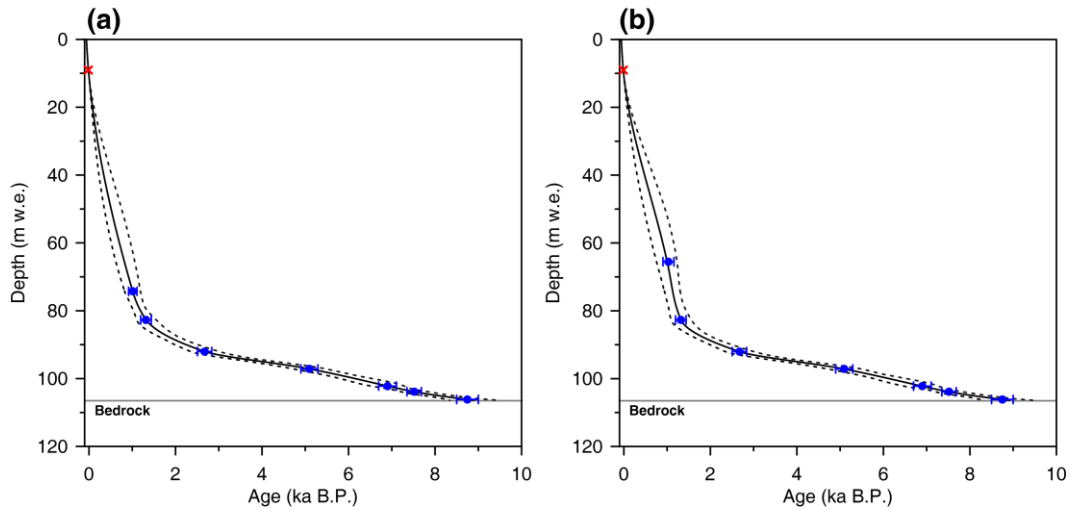

Fig. S4. The alternative age–depth relations of the ZK ice core derived without ZK-1 (a) or ZK-2 (b) based on 2000 Monte Carlo simulations fitting the absolute dated age horizons. For each chart, the solid black line indicates the mean values and dotted lines indicate the  $1\sigma$  confidence interval. The red cross stands for the reference layer of  $\beta$ -activity peak in 1963 (An et al., 2016). Blue dots show the ages derived with the WIOC  $^{14}\text{C}$  results, and the error bars represent the  $1\sigma$  range. The two models gave the bottom age estimates of  $8.90 \pm_{0.57}^{0.56}$  ka BP (excluding ZK-1) or  $8.91 \pm_{0.59}^{0.57}$  ka BP (excluding ZK-2) respectively.

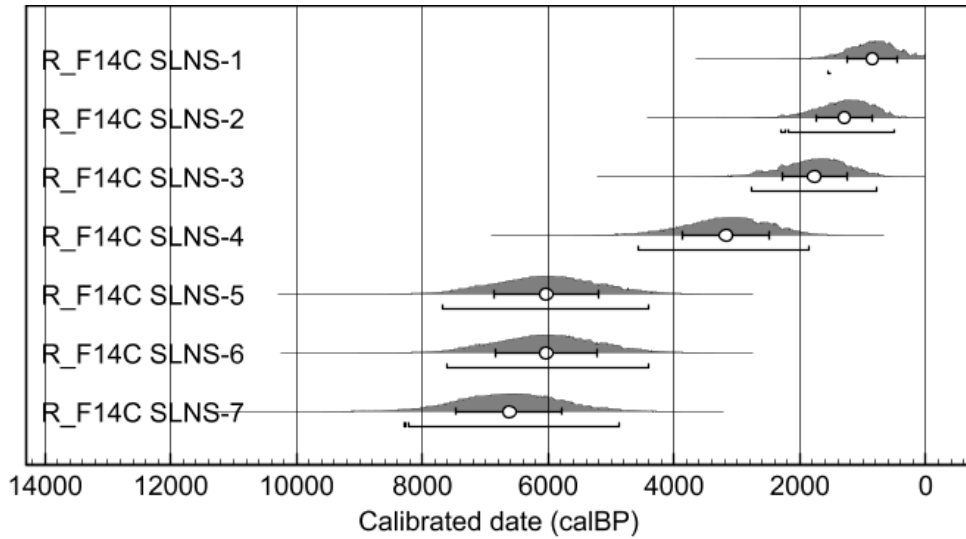

Fig. S5. The  $^{14}\text{C}$  cal age probability distributions of the SNLS ice core samples, as derived in OxCal v4.3.2 using the IntCal 13 radiocarbon calibration curve (Ramsey and Lee, 2013; Reimer et al., 2013). Probability distributions of calibrated ages are indicated as grey area with the mean age ( $\mu$ ) shown as dot together with the  $1\sigma$  range. The lines below the probability distribution area indicates the  $2\sigma$  range.

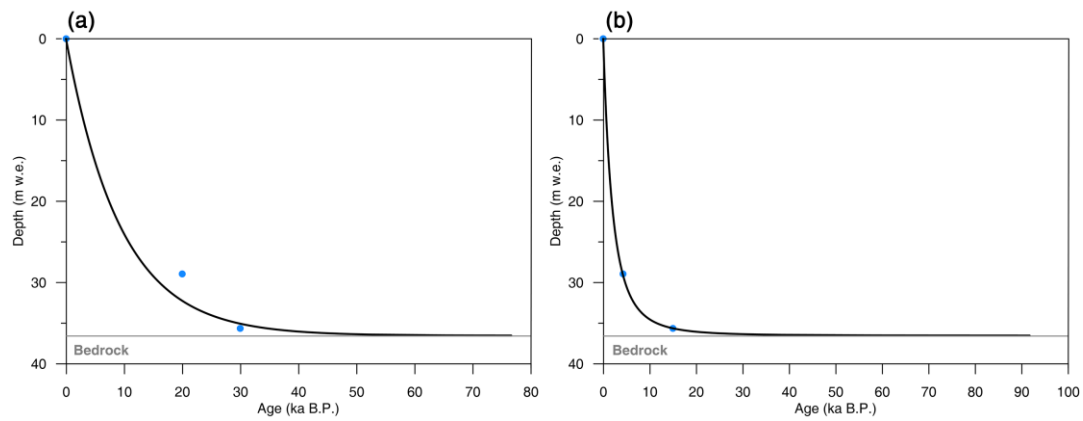

Fig. S6. The depth - age relationship of the 50.86 m Guliya2015 summit ice core based on the two ages at the depths of 41.10 - 41.84 m and 49.51 - 49.90 m from Zhong et al. (2018) (a) and revised ages from Zhong et al., 2020 (b) using a two-parameter (2p) flow model. Confidence interval of the 2p model fit cannot be calculated due to a lack of data. More details about the model can be found in Hou et al. (2019).



50 Table S1. The  $^{14}\text{C}$  ages of the 127.776 m ZK ice core. Absolute uncertainties are given as  $1\sigma$  range.

| Sample # | Depth (m)     | Mass (g) | WIOC<br>( $\mu\text{g}$ ) | Bern AMS<br>No. | F $^{14}\text{C}$ | $^{14}\text{C}$ age<br>(ka BP) | Cal age<br>(ka cal BP) | $\mu \pm \sigma$<br>(ka cal BP) |
|----------|---------------|----------|---------------------------|-----------------|-------------------|--------------------------------|------------------------|---------------------------------|
| ZK-1     | 79.96-80.92   | 940      | 50                        | 10075.1.1       | 0.872 $\pm$ 0.013 | 1.100 $\pm$ 0.118              | 0.923-1.178            | 1.031 $\pm$ 0.127               |
| ZK-2     | 89.98-90.68   | 588      | 130                       | 10084.1.1       | 0.874 $\pm$ 0.012 | 1.079 $\pm$ 0.110              | 0.917-1.174            | 1.013 $\pm$ 0.123               |
| ZK-3     | 99.89-100.59  | 566      | 55                        | 10091.1.1       | 0.840 $\pm$ 0.012 | 1.398 $\pm$ 0.115              | 1.181-1.475            | 1.317 $\pm$ 0.122               |
| ZK-4     | 110.77-111.39 | 590      | 60                        | 10093.1.1       | 0.723 $\pm$ 0.011 | 2.610 $\pm$ 0.125              | 2.491-2.854            | 2.673 $\pm$ 0.166               |
| ZK-5     | 116.58-117.33 | 852      | 128                       | 10094.1.1       | 0.575 $\pm$ 0.010 | 4.446 $\pm$ 0.146              | 4.879-5.286            | 5.095 $\pm$ 0.197               |
| ZK-6     | 122.57-123.27 | 614      | 89                        | 10095.1.1       | 0.475 $\pm$ 0.010 | 6.033 $\pm$ 0.168              | 6.634-7.154            | 6.901 $\pm$ 0.204               |
| ZK-7     | 124.54-125.15 | 548      | 200                       | 10096.1.1       | 0.438 $\pm$ 0.010 | 6.637 $\pm$ 0.182              | 7.329-7.674            | 7.517 $\pm$ 0.166               |
| ZK-8     | 127.18-127.78 | 558      | 113                       | 10027.1.1       | 0.376 $\pm$ 0.009 | 7.863 $\pm$ 0.205              | 8.481-8.983            | 8.750 $\pm$ 0.250               |

Table S2. The  $^{14}\text{C}$  age of the 81.05 m SLNS ice core. Absolute uncertainties are given as  $1\sigma$  range.

| Sample # | Depth (m)   | Mass (g) | WIOC ( $\mu\text{g}$ ) | Bern AMS No. | $\text{F}^{14}\text{C}$ | $^{14}\text{C}$ age (ka BP) | Cal. age (ka cal BP) | $\mu \pm \sigma$ (ka cal BP) |
|----------|-------------|----------|------------------------|--------------|-------------------------|-----------------------------|----------------------|------------------------------|
| SLNS-1   | 56.79-57.49 | 420      | 42                     | 12325.1.1    | $0.902 \pm 0.047$       | $0.829 \pm 0.419$           | 0.492-1.262          | $0.851 \pm 0.395$            |
| SLNS-2   | 64.66-65.36 | 426      | 45                     | 12324.1.1    | $0.852 \pm 0.046$       | $1.287 \pm 0.434$           | 0.766-1.688          | $1.298 \pm 0.449$            |
| SLNS-3   | 68.88-69.69 | 425      | 59                     | 12323.1.1    | $0.807 \pm 0.046$       | $1.723 \pm 0.458$           | 1.185-2.301          | $1.775 \pm 0.514$            |
| SLNS-4   | 71.84-72.50 | 483      | 51                     | 12322.1.1    | $0.695 \pm 0.046$       | $2.923 \pm 0.531$           | 2.365-3.708          | $3.178 \pm 0.680$            |
| SLNS-5   | 76.75-77.46 | 374      | 51                     | 12321.1.1    | $0.522 \pm 0.046$       | $5.222 \pm 0.708$           | 5.071-6.881          | $6.033 \pm 0.829$            |
| SLNS-6   | 78.90-79.63 | 485      | 61                     | 12320.1.1    | $0.522 \pm 0.045$       | $5.222 \pm 0.692$           | 5.075-6.854          | $6.032 \pm 0.811$            |
| SLNS-7   | 80.30-81.02 | 413      | 62                     | 12319.1.1    | $0.489 \pm 0.046$       | $5.747 \pm 0.740$           | 5.761-7.424          | $6.619 \pm 0.841$            |
